# Supplementary material
Source: PubMed Central journal article supplement (PMC2789234)
Supplement: NIHMS126289-supplement-sfig.pdf [file NIHMS126289-supplement-sfig.pdf]

# Online supplement, Figure 1

Holdt et al.

## ADAM17 proximal promoter; 2752bp upstream of the start codon

C57 TTGACAATCGGTAACAAAGTCAATGGGAAGCAGAAGCCACCACAGGCCCTCTCGGGGACTTTCCCAATTATACCTCAGTCCCCAGAATTAATTTATCTGCAGGTGGCAAAGATCACACCCCTGCTAGTGCCTGAGGCAAATCCTAATCAC 150  
FVB TTGACAATCGGTAACAAAGTCAATGGGAAGCAGAAGCCACCACAGGCCCTCTCGGGGACTTTCCCAATTATACCTCAGTCCCCAGAATTAATTTATCTGCAGGTGGCAAAGATCACACCCCTGCTAGTGCCTGAGGCAAATCCTAATCAC 150

C57 CTGCTGTGAAGCAGCCTCTTATCTCACACCTGGGATTAACAAAACAAATTTCTCTAACTGGTTTTTTAAAGAACTAAAATTTCTCACCACAAAGCTGCATTTTTTTTTTTGAGACTTGAGAATTCATATTTCTTGAAGGGCTAGCTTTAT 300  
FVB CTGCTGTGAAGCAGCCTCTTATCTCACACCTGGGATTAACAAAACAAATTTCTCTAACTGGTTTTTTAAAGAACTAAAATTTCTCACCACAAAGCTGCATTTTTTTTTTTGAGACTTGAGAATTCATATTTCTTGAAGGGCTAGCTTTAT 300

C57 CAACTTTATTTCAGCAGCAGAAAAAGCATCCAAATTAAGGTTTTATGACAGATAGGGTGAAGACAGTTAGGGCTTCAAGGTGGCTCAGTGCAGTGGGTAGATATTATGGGGGTGATTTTTTTCTCTTAAAAAACAACAAAAGACTAAG 450  
FVB CAACTTTATTTCAGCAGCAGAAAAAGCATCCAAATTAAGGTTTTATGACAGATAGGGTGAAGACAGTTAGGGCTTCAAGGTGGCTCAGTGCAGTGGGTAGATATTATGGGGGTGATTTTTTTCTCTTAAAAAACAACAAAAGACTAAG 450

C57 ATAAAGGCTTGTAGCCAAGTGTGATGGCCATGCCATCATCTAGCGACAGGGAGGCTGAAGCTGGAAGCCCTGGGCAGGGTTACAAAATGAGCCTAGCTCATAAAGCCCATCACACTTTTCCCTTCTAGGACAAATCCCCAAAAAT 600  
FVB ATAAAGGCTTGTAGCCAAGTGTGATGGCCATGCCATCATCTAGCGACAGGGAGGCTGAAGCTGGAAGCCCTGGGCAGGGTTACAAAATGAGCCTAGCTCATAAAGCCCATCACACTTTTCCCTTCTAGGACAAATCCCCAAAAAT 600

C57 AAACCTTGTAGGGTCAGGCTTCGACTGTCAGTTTTGGGACTCTTGATTTAACATAGCCCTGGCTGTGTTCTGTGTGTCAGCCTCCTAGTGTGGGATGGCAGGCATGGGTACCACCAAGCTGTAGGTGCCAGTTCTGCCCTGCAGGCTTT 750  
FVB AAACCTTGTAGGGTCAGGCTTCGACTGTCAGTTTTGGGACTCTTGATTTAACATAGCCCTGGCTGTGTTCTGTGTGTCAGCCTCCTAGTGTGGGATGGCAGGCATGGGTACCACCAAGCTGTAGGTGCCAGTTCTGCCCTGCAGGCTTT 750

C57 TATCCAGCATGGCCCTCTGAGATGTTCTCTGGCTCTTCATCTCCCCAGGTGGAGTTATTTTTATCCTAAAGATATGGACTATTTGTCAAATCAAAGATGAATTTCAAATTTGGAATCTTAATTTGAATACTGACTTGTGAATGTTGAAGAC 900  
FVB TATCCAGCATGGCCCTCTGAGATGTTCTCTGGCTCTTCATCTCCCCAGGTGGAGTTATTTTTATCCTAAAGATATGGACTATTTGTCAAATCAAAGATGAATTTCAAATTTGGAATCTTAATTTGAATACTGACTTGTGAATGTTGAAGAC 900

C57 TACTTAAAAATGGGACTTATCTGAAAACTTGTATGATAAAGTGGATCAGGAGTTTTTTAAAAATTAGCACAGTGAAGCCAGCCTGGTCTACAGAGTGAATTTCCAGGACAGCCAGGACCACACACAGAAATCCTGTCTCGAAAAACAAC 1050  
FVB TACTTAAAAATGGGACTTATCTGAAAACTTGTATGATAAAGTGGATCAGGAGTTTTTTAAAAATTAGCACAGTGAAGCCAGCCTGGTCTACAGAGTGAATTTCCAGGACAGCCAGGACCACACACAGAAATCCTGTCTCGAAAAACAAC 1050

C57 AACAAAAAACCACAAAAACAGACACCCCTCCCTCCCTCCAAAAAACCACAAAAACCAAAACCTAGCACAGTGGTACTCAACCCCTTGGGTGAGTATCCCTTTGGGGGTGTCAGGGTCCCATTATCAGGTACCCCTGCAGTTATTTA 1200  
FVB AACAAAAAACCACAAAAACAGACACCCCTCCCTCCCTCCAAAAAACCACAAAAACCAAAACCTAGCACAGTGGTACTCAACCCCTTGGGTGAGTATCCCTTTGGGGGTGTCAGGGTCCCATTATCAGGTACCCCTGCAGTTATTTA 1200

C57 CATTACCCTTTATAGCCGTAGCAAAATATAGTCAATGAAGCTGCAATTAACAATATATGGTTCAGGGTCTCCACACATGAGGAACTGTAGTAGAGGGTCCAAAGCATTAGGAAGGCTGAGTGCACCTGAAATAGCATTTACTAAACATAG 1350  
FVB CATTACCCTTTATAGCCGTAGCAAAATATAGTCAATGAAGCTGCAATTAACAATATATGGTTCAGGGTCTCCACACATGAGGAACTGTAGTAGAGGGTCCAAAGCATTAGGAAGGCTGAGTGCACCTGAAATAGCATTTACTAAACATAG 1350

C57 CTCAGCTGCACAAAAGCTAGGCGACACAAAATATAATCTGCAGTCAACTAAAGTTACAAAACCTGGGGACATGGAGCCTGGACACTCAAGAGAAATATCATAGCATTTCTATTATTAAGAGGTGGCATCTACCGGGCGGTGGTGGCGC 1500  
FVB CTCAGCTGCACAAAAGCTAGGCGACACAAAATATAATCTGCAGTCAACTAAAGTTACAAAACCTGGGGACATGGAGCCTGGACACTCAAGAGAAATATCATAGCATTTCTATTATTAAGAGGTGGCATCTACCGGGCGGTGGTGGCGC 1500

C57 ACGCCTTTAATCCAGCACTCGGGAGGCAGAGGCAGGCGGATTTCTGAGTTCAAGGCCAGCCTGGCCTACAGAGTGAATTTCAAGCAGCCAGGGTTATACAGAGAAACCCCTGTCTCGAAAAAACAACAAAACAAAACAAAACAAA 1650  
FVB ACGCCTTTAATCCAGCACTCGGGAGGCAGAGGCAGGCGGATTTCTGAGTTCAAGGCCAGCCTGGCCTACAGAGTGAATTTCAAGCAGCCAGGGTTATACAGAGAAACCCCTGTCTCGAAAAAACAACAAAACAAAACAAAACAAA 1650

C57 CAAAACAAAAAAGCTGGCATCTAATTTGTGGGGTGACTTTCTTTTTTTGGTTAGGTATTCCTTGAATGTGTACTAGTGAAGTGTTTATACCTCGTGTACAGACTAGTTAGCTAACATGCCCCCAAAAAAATGTGCAAAAGTCA 1800  
FVB CAAAACAAAAAAGCTGGCATCTAATTTGTGGGGTGACTTTCTTTTTTTGGTTAGGTATTCCTTGAATGTGTACTAGTGAAGTGTTTATACCTCGTGTACAGACTAGTTAGCTAACATGCCCCCAAAAAAATGTGCAAAAGTCA 1800

C57 GTAACCTGTTGAAAATGTTGCAAGACATTCACAACGAACAAATTAATCAGTTTATCTTTTTTCTGGAAGACGACTTGAATCTGACCAGGGCTATTAATGTTTCAGTACCACAAACAATAACACAGGG-- --AAAAAAGACGG 1950  
FVB GTAACCTGTTGAAAATGTTGCAAGACATTCACAACGAACAAATTAATCAGTTTATCTTTTTTCTGGAAGACGACTTGAATCTGACCAGGGCTATTAATGTTTCAGTACCACAAACAATAACACAGGGGAAAAAAGACGG 1950

C57 CAAAACCAAGGGGTGAGTAGGAAACCAACTACAAGAGTTAGGGGTAGATGGTTCGCTCTGTTCACTAGGAGACTGCCTAGAGTAAGGAACCAAGGAGCAAAATAATGCTTTGTCATAAGTCTATGTACAGTCCCCTGAGCATTTT 2100  
FVB CAAAACCAAGGGGTGAGTAGGAAACCAACTACAAGAGTTAGGGGTAGATGGTTCGCTCTGTTCACTAGGAGACTGCCTAGAGTAAGGAACCAAGGAGCAAAATAATGCTTTGTCATAAGTCTATGTACAGTCCCCTGAGCATTTT 2100

C57 CAGTGACAA--GAGACCTAGTCTCCCAGCAAGTTCGCCGAACAGCACACCCGATCCCGCTGGGGCGGATCTCCAGGGCACTGTGGCCGACTTACGCCCCCATCCCATAGGCAGGTAGTTGACCCACGCCAGACTTCACAGACCCCTC 2250  
FVB CAGTGACAAAGAGACCTAGTCTCCCAGCAAGTTCGCCGAACAGCACACCCGATCCCGCTGGGGCGGATCTCCAGGGCACTGTGGCCGACTTACGCCCCCATCCCATAGGCAGGTAGTTGACCCACGCCAGACTTCACAGACCCCTC 2250

C57 AATAAAGACGCTGAAGGGGACTTTAATCAGGAAGAAGTTCGACCTGTCTAAGGACCTGCCATCCTCTCCACCTTCTGTTCCCGCGGTACCCGGGGACAGAGGCAGAGAGAGAGGGTTCGAGTACAGGACGCCCGAGCTGAAGGCCA 2400  
FVB AATAAAGACGCTGAAGGGGACTTTAATCAGGAAGAAGTTCGACCTGTCTAAGGACCTGCCATCCTCTCCACCTTCTGTTCCCGCGGTACCCGGGGACAGAGGCAGAGAGAGAGGGTTCGAGTACAGGACGCCCGAGCTGAAGGCCA 2400

C57 GGAAGGCCTCAAGCAGGCCAGAGGGACCAGGAAGAACAGAGCCAGAAGATGGCGTTCTGCCGGCGCCGCCGGGGCGGGGCGAGCCAGCCCTCCACAATGCTCTACGGCACCCCTTCTTCCGGCTGTGGGCGCGGGGTGGTCTC 2550  
FVB GGAAGGCCTCAAGCAGGCCAGAGGGACCAGGAAGAACAGAGCCAGAAGATGGCGTTCTGCCGGCGCCGCCGGGGCGGGGCGAGCCAGCCCTCCACAATGCTCTACGGCACCCCTTCTTCCGGCTGTGGGCGCGGGGTGGTCTC 2550

C57 CGGCTGCGGGCGGAAACGAGTTAAGCCGCTCTCAGCGAGCGCGCCTGCACCTTCCGGGAGCTTCCGCTGAGGCTAGCTTCCCTGTAGGCGGGCGGGAGGGAGAAGTTTGCAGGGCCGTGCTGGGAAGATCACCTCCGCTCCCATGGGAGCAGT 2700  
FVB CGGCTGCGGGCGGAAACGAGTTAAGCCGCTCTCAGCGAGCGCGCCTGCACCTTCCGGGAGCTTCCGCTGAGGCTAGCTTCCCTGTAGGCGGGCGGGAGGGAGAAGTTTGCAGGGCCGTGCTGGGAAGATCACCTCCGCTCCCATGGGAGCAGT 2700

C57 TTCCCGAACGCTCTTTCCGGAAGGTTTCCAGAGAGGTGGTGGACGGGACAATG 2755  
FVB TTCCCGAACGCTCTTTCCGGAAGGTTTCCAGAGAGGTGGTGGACGGGACAATG 2755

ACGT promoter region  
ATG start codon  
ACGT exon 1

## ADAM17 cDNA (2484bp)

|     |                                                                                                                                                          |      |
|-----|----------------------------------------------------------------------------------------------------------------------------------------------------------|------|
| C57 | ATGAGGCGGGCTCTCCTCATCCTGACCACCTTTGGTGCCTTCGTCTGGCACCCCGACCTCCGGAGGAAGCAGGCTCTGGCTCCCATCCGCGACTTGAGAAGCTTGATTCTTTGCTCTCAGACTACGACATCCTCTCCTTAGCTAATATT    | 150  |
| FVB | ATGAGGCGGGCTCTCCTCATCCTGACCACCTTTGGTGCCTTCGTCTGGCACCCCGACCTCCGGAGGAAGCAGGCTCTGGCTCCCATCCGCGACTTGAGAAGCTTGATTCTTTGCTCTCAGACTACGACATCCTCTCCTTAGCTAATATT    | 150  |
| C57 | CAGCAGCACTCCATAAGGAAAAGGGATCTACAGTCTGCGACACACTTAGAAACATTACTAACTTTTTTCAGCTTTGAAAAGCATTTTAAATTATACTTGACATCAAGTACCGAACGCTTTTTCACAAACTTGAGAGTCGTGGTGGTGAC    | 300  |
| FVB | CAGCAGCACTCCATAAGGAAAAGGGATCTACAGTCTGCGACACACTTAGAAACATTACTAACTTTTTTCAGCTTTGAAAAGCATTTTAAATTATACTTGACATCAAGTACCGAACGCTTTTTCACAAACTTGAGAGTCGTGGTGGTGAC    | 300  |
| C57 | GGGAAAAGAAGAAAGCGAGTACAGCGTGAAGTGGCAGCACTTCTTCTCAGTGGTACCGTGGTTGGTGAGCCTGACTCTAGGGTTCTAGCCACATAGGAGATGATGATGTTACAGTGAAGTCAACACAGATGGGGCAGAATATAACGTAGAG  | 450  |
| FVB | GGGAAAAGAAGAAAGCGAGTACAGCGTGAAGTGGCAGCACTTCTTCTCAGTGGTACCGTGGTTGGTGAGCCTGACTCTAGGGTTCTAGCCACATAGGAGATGATGATGTTACAGTGAAGTCAACACAGATGGGGCAGAATATAACGTAGAG  | 450  |
| C57 | CCACTTTGGAGGTTTGTCAATGATACTAAAGATAAACGAATGCTGGTGTATAAGTCTGAAGATATCAAGGATTTTTTCAGCTTTGAGTCTCCAAAAGTATGTGGTTATTAAATGCAGATAGTGAAGAGCTGCTTCCAAAAGGGCTCATA    | 600  |
| FVB | CCACTTTGGAGGTTTGTCAATGATACTAAAGATAAACGAATGCTGGTGTATAAGTCTGAAGATATCAAGGATTTTTTCAGCTTTGAGTCTCCAAAAGTATGTGGTTATTAAATGCAGATAGTGAAGAGCTGCTTCCAAAAGGGCTCATA    | 600  |
| C57 | GACAGAGAGCCATCTGAAGAGTTTGTTCGTCGAGTGAAGAGACGAGCTGAACCTAACCCCTTGAAGAATACTTGTAAATTAAGTCTGGTGGTAGCAGATCATCGATTTTATAAATACATGGGCCGTGGAGAAGAGAGCACCCTACAAATTAC | 750  |
| FVB | GACAGAGAGCCATCTGAAGAGTTTGTTCGTCGAGTGAAGAGACGAGCTGAACCTAACCCCTTGAAGAATACTTGTAAATTAAGTCTGGTGGTAGCAGATCATCGATTTTATAAATACATGGGCCGTGGAGAAGAGAGCACCCTACAAATTAC | 750  |
| C57 | TTAATAGAGCTAATTGACCGAGTTGATGACATATACCGAACACGTCGTGGGATAATGCAGGGTTTAAAGGGTATGGAGTGCAGATAGAGCAGATTGCAATTCTCAAGTCTCCACAAGAGGTAACCTGGTGAAAGACACTTCAATATG      | 900  |
| FVB | TTAATAGAGCTAATTGACCGAGTTGATGACATATACCGAACACGTCGTGGGATAATGCAGGGTTTAAAGGGTATGGAGTGCAGATAGAGCAGATTGCAATTCTCAAGTCTCCACAAGAGGTAACCTGGTGAAAGACACTTCAATATG      | 900  |
| C57 | GCAAAAGTTTCCCAAACGAAGAGAAGGATGCTTGGGATGTGAAGATGCTATTAGAGCAATTTAGCTTTGATATAGCTGAAGAAGCATCTTAAAGTCTGCCTGGCTCATCTTTTACGTACCAGGATTTTGATATGGAACTCTTGGATTA     | 1050 |
| FVB | GCAAAAGTTTCCCAAACGAAGAGAAGGATGCTTGGGATGTGAAGATGCTATTAGAGCAATTTAGCTTTGATATAGCTGAAGAAGCATCTTAAAGTCTGCCTGGCTCATCTTTTACGTACCAGGATTTTGATATGGAACTCTTGGATTA     | 1050 |
| C57 | GCTTACGTTGGTTCTCCAGAGCAAAACAGTCATGGAGGGGTTTGTCCGAAAGCTTATTACAACCCAACCTGTGAAGAAAAACATCTATTAAATAGTGGTCTGACTAGTACTAAAAATATGGCAAACTATTCTCACAAAGGAAGCTGAC     | 1200 |
| FVB | GCTTACGTTGGTTCTCCAGAGCAAAACAGTCATGGAGGGGTTTGTCCGAAAGCTTATTACAACCCAACCTGTGAAGAAAAACATCTATTAAATAGTGGTCTGACTAGTACTAAAAATATGGCAAACTATTCTCACAAAGGAAGCTGAC     | 1200 |
| C57 | CTGGTTACAACCTCATGAATTGGGACATAATTTGGAGCAGAACATGACCTGATGGCTAGCAGAATGTGCCCAAATGAGGACCAAGGAGGAAAGTATGTCATGTATCCCATAGCTGTGAGCGGTGACCACGAGAATAATAAGATGTTT      | 1350 |
| FVB | CTGGTTACAACCTCATGAATTGGGACATAATTTGGAGCAGAACATGACCTGATGGCTAGCAGAATGTGCCCAAATGAGGACCAAGGAGGAAAGTATGTCATGTATCCCATAGCTGTGAGCGGTGACCACGAGAATAATAAGATGTTT      | 1350 |
| C57 | TCAAACCTGCAGTAAACAGTCCATCTACAAGCCATAGAAAGTAAGGCTCAAGAGTCTTCCAGGAGCGCAGCAACAAGGTGTGGCAACTCCAGGGTGGATGAAGGAGAGGAGTGTGACCCGGGTATTATGTACCTGAACAACGACACC      | 1500 |
| FVB | TCAAACCTGCAGTAAACAGTCCATCTACAAGCCATAGAAAGTAAGGCTCAAGAGTCTTCCAGGAGCGCAGCAACAAGGTGTGGCAACTCCAGGGTGGATGAAGGAGAGGAGTGTGACCCGGGTATTATGTACCTGAACAACGACACC      | 1500 |
| C57 | TGCTGCAATAGTACTGCACACTGAAGCCGGGTGTGCACTGCAGTATAGGAACAGTCCCTGCTGTAAAAACCTGTCAGTTTGAGACGCGCAGAAGAAGTGCAGGAGGCTATTAATGCTACATGCAAAGGAGTGTCTTACTGCACAGGG      | 1650 |
| FVB | TGCTGCAATAGTACTGCACACTGAAGCCGGGTGTGCACTGCAGTATAGGAACAGTCCCTGCTGTAAAAACCTGTCAGTTTGAGACGCGCAGAAGAAGTGCAGGAGGCTATTAATGCTACATGCAAAGGAGTGTCTTACTGCACAGGG      | 1650 |
| C57 | AATAGCAGTGAAGTGCACACTGAAGCCGGGTGTGCACTGCAGTATAGGAACAGTCCCTGCTGTAAAAACCTGTCAGTTTGAGACGCGCAGAAGAAGTGCAGGAGGCTATTAATGCTACATGCAAAGGAGTGTCTTACTGCACAGGG       | 1800 |
| FVB | AATAGCAGTGAAGTGCACACTGAAGCCGGGTGTGCACTGCAGTATAGGAACAGTCCCTGCTGTAAAAACCTGTCAGTTTGAGACGCGCAGAAGAAGTGCAGGAGGCTATTAATGCTACATGCAAAGGAGTGTCTTACTGCACAGGG       | 1800 |
| C57 | AAGGTGTGCTGCAGGAACCTTTCTGGCCCGTGTGTGCCGTACGTGATGAGAGCAAAAGAACTTGTTTTTGAGGAAAGGGAAGCCATGTACAGTAGGGTTTTCGACATGAATGGCAAATGTGAGAAACGAGTACAGGACGTAATTGAG      | 1950 |
| FVB | AAGGTGTGCTGCAGGAACCTTTCTGGCCCGTGTGTGCCGTACGTGATGAGAGCAAAAGAACTTGTTTTTGAGGAAAGGGAAGCCATGTACAGTAGGGTTTTCGACATGAATGGCAAATGTGAGAAACGAGTACAGGACGTAATTGAG      | 1950 |
| C57 | CGATTTTGGGATTTTCAATTGACAGCTGAGCATCAACACTTTTGGGAAGTTTCTGGCAGATAACATCGTTGGGTCTGTTCTGGTTTCTCCTTGATATTTGGATTCTTTTCAGCATTCTTGTCCACTGTGTGGATAAAGAACTGGACAAG    | 2100 |
| FVB | CGATTTTGGGATTTTCAATTGACAGCTGAGCATCAACACTTTTGGGAAGTTTCTGGCAGATAACATCGTTGGGTCTGTTCTGGTTTCTCCTTGATATTTGGATTCTTTTCAGCATTCTTGTCCACTGTGTGGATAAAGAACTGGACAAG    | 2100 |
| C57 | CAGTATGAATCCCTGTCTCTGTTTTCATCAGTAACATTGAGATGCTGAGCAGCATGGACTCAGCATCTGTTTCGCATCATCAAGCCCTTTCCTGCACCCAGACTCCAGGTCGTCTGCAGGCCCTGCAGCCAGCTGCCATGATGCCGCCA    | 2250 |
| FVB | CAGTATGAATCCCTGTCTCTGTTTTCATCAGTAACATTGAGATGCTGAGCAGCATGGACTCAGCATCTGTTTCGCATCATCAAGCCCTTTCCTGCACCCAGACTCCAGGTCGTCTGCAGGCCCTGCAGCCAGCTGCCATGATGCCGCCA    | 2250 |
| C57 | GTACCTGCGCTCCAAAACCTGGACCACCAGGGATGGACACCATCCAGGAAGACCCAGCAGACTCAGACTCAGATGATGACGGTTTGTGAGAAGGACCCCTTCCCAAACAGCAGCAGCTGCCAAGTCTTTGAGGACTCACAGAC          | 2400 |
| FVB | GTACCTGCGCTCCAAAACCTGGACCACCAGGGATGGACACCATCCAGGAAGACCCAGCAGACTCAGACTCAGATGATGACGGTTTGTGAGAAGGACCCCTTCCCAAACAGCAGCAGCTGCCAAGTCTTTGAGGACTCACAGAC          | 2400 |
| C57 | CACCCAGTCACCCAGGAGCGAAAAGGCGGCTCATTCAAGCTGCAGCGTGCAGAGCCGAGTTGACAGCAAAGAGACAGAGTGC                                                                       | 2484 |
| FVB | CACCCAGTCACCCAGGAGCGAAAAGGCGGCTCATTCAAGCTGCAGCGTGCAGAGCCGAGTTGACAGCAAAGAGACAGAGTGC                                                                       | 2484 |

ATG start codon  
TAG stop codon  
ACGT coding sequence

**ADAM17 3'-untranslated region (381bp)**

```
C57 TAGTGGGGAACCTTGGCCTGCTCTAGGACATATACCTGCAGATGTTCCATAGAGCTGACCTGAATCAAACATAGATTATAATGATCTGAGAAACGGGGAAGCAACTTAGCAGATGCTGGTCATGTGCTATGACCTTCACATGACATCCTATG 150
FVB TAGTGGGGAACCTTGGCCTGCTCTAGGACATATACCTGCAGATGTTCCATAGAGCTGACCTGAATCAAACATAGATTATAATGATCTGAGAAACGGGGAAGCAACTTAGCAGATGCTGGTCATGTGCTATGACCTTCACATGACATCCTATG 150

C57 TATGTAGGCCCTTTGAAGAGGTGAGGTAAATCTGGCTTATGTAAGGCTTTCAGGTTTTGGGTTTTCTTTTATAATCTAAAATCTCCTTTGACCTGTGGTGCAGAAGCAGAAAGTAAGGCTGGACCCCGTTCCTGGTGACAGTGCTGTTAAGT 300
FVB TATGTAGGCCCTTTGAAGAGGTGAGGTAAATCTGGCTTATGTAAGGCTTTCAGGTTTTGGGTTTTCTTTTATAATCTAAAATCTCCTTTGACCTGTGGTGCAGAAGCAGAAAGTAAGGCTGGACCCCGTTCCTGGTGACAGTGCTGTTAAGT 300

C57 CTTTCAGTCTGTTTTTCTGTACCCCTCTGACTACAGTGAAGCACTTAACAGTGAGGATAACTGGAACACAGACATACTT 381
FVB CTTTCAGTCTGTTTTTCTGTATCCTCTGACTACAGTGAAGCACTTAACAGTGAGGATAACTGGAACACAGACATACTT 381
```

**ATC** stop codon  
**ACGT** 3'-UTR sequence

## AhR proximal promoter; 1467bp upstream of the start codon

C57 CCTGGGCACCAATTGTTGTTCTTAGTTTTCTCGCTATCCTTTTCCTTGCTGTTGTGTATCCTCTCTTCTGATCTCTTTCTCAAATCTATAAAACACATCAGACTTCATCTCTATCTTTCATGTCCAGCATCACCTACCTGACTCCCAA 150  
FVB CCTGGGCACCAATTGTTGTTCTTAGTTTTCTCGCTATCCTTTTCCTTGCTGTTGTGTATCCTCTCTTCTGATCTCTTTCTCAAATCTATAAAACACATCAGACTTCATCTCTATCTTTCATGTCCAGCATCACCTACCTGACTCCCAA 150

C57 ATCACTTCTCTGCCTCTATTCTTTGGTGGTTAACAGCGACCTTCCTCTTTCCTTTATCATCTCTGCTGCTCTTTTCTCTCATCCCCATGGCTGTGCCATTGGTCTTGAGCTGGTCGATTCATCAATTTCCCAGCGATTCTCTCTTC 300  
FVB ATCACTTCTCTGCCTCTATTCTTTGGTGGTTAACAGCGACCTTCCTCTTTCCTTTATCATCTCTGCTGCTCTCTTTTCTCTCATCCCCATGGCTGTGCCATTGGTCTTGAGCTGGTCGATTCATCAATTTCCCAGCGATTCTCTCTTC 300

C57 CATCTGTTTTGTTCCTGAGTAACAGAATTTCCACCTTTTCCACAGTGACTTTCCCAAGAAAGATGGAACATCATCTTCCAAATTAAGCCTTTAAAAGCTCTCTGTTGTCTGCAGAATGAGACCCAATTTCTTATTAAATCTTTATGAT 450  
FVB CATCTGTTTTGTTCCTGAGTAACAGAATTTCCACCTTTTCCACAGTGACTTTCCCAAGAAAGATGGAACATCATCTTCCAAATTAAGCCTTTAAAAGCTCTCTGTTGTCTGCAGAATGAGACCCAATTTCTTATTAAATCTTTATGAT 450

C57 TTGTTCTAGATTATCTTTTTTTTTTTTTTTTTCTTTTTCTCCCATCAGCTTACCGTACTACTAACAGAAACTCAGGTCTCTGGTCATAGTCTCAGTACCTACCTCCAAATTTCTCATGCTCTCAGCACTCCTGTGCTTCTTTCCTTCTC 600  
FVB TTGTTCTAGATTATCTTTTTTTTTTTTTTTTTCTTTTTCTCCCATCAGCTTACCGTACTACTAACAGAAACTCAGGTCTCTGGTCATAGTCTCAGTACCTACCTCCAAATTTCTCAAGCTCTCAGCACTCCTGTGCTTCTTTCCTTCTC 600

C57 ATCTTCTGAAGTCTGATGGAGGAAACGATGTTTTATTGCTTCTGTAGACATAAAATAAATGTGGGAGGAAAAGGATTATAAAACTCGTAGCCTTCAAGACAATAACTTTGCAGGGCATTTTTGAAGTTTTCCCTTAGAATGCTCT 750  
FVB ATCTTCTGAAGTCTGATGGAGGAAAAGATGTTTTATTGCTTCTGTAGACATAAATAAATGTGGGAGGAAAAGGATTATAAAACTCGTAGCCTTCAAGACAATAACTTTGCAGGGCATTTTTGAAGTTTTCCCTTAGAATGCTCT 750

C57 CCAGTCGCAGTTATTTATCTACCAGCTCAATGTAATAATCTTTGTCAAAAATTAGATGACTCAACTCTAGGATGAGCTAAGCTCTTTGCCTGGTAAATCTTGATGTCTGGGTTACAAGGAATTTGCCTAGGCATAATGTGGCCTCACACCC 900  
FVB CCAGTCGCAGTTATTTATCTACCAGCTCAATGTAATAATCTTTGTCAAAAATTAGATGACTCAACTCTAGGATGAGCTAAGCTCTTTGCCTGGTAAATCTTGATGTCTGGGTTACAAGGAATTTGCCTAGGCATAATGTGGCCTCACACCC 900

C57 CTTTTGAGGCTGGAAAACAGGTAAGTGGGCGAACACCACCCACCCAGAACCTCGGACTGCAAGAAGTGTGGGAGTCACTACGTCTGCGTCAACAGTGTGCAAGAGGGTGGGGCCCTCCTGGGAACCGTGAGGGGCGGGGCCGA 1050  
FVB CTTTTGAGGCTGGAAAACAGGTAAGTGGGCGAACACCACCCACCCAGAACCTCGGACTGCAAGAAGTGTGGGAGTCACTACGTCTGCGTCAACAGTGTGCAAGAGGGTGGGGCCCTCCTGGGAACCGTGAGGGGCGGGGCCGA 1050

C57 GCAGTGGGGCGGGCTGGAGCCGGGGCGGAGCTGCGCGGGTTCGCGGTGCGGAGGAGCGGGCTCGCGGGGGCGGAGCGTGTGTGCGCTCCCTTTGACGCTCGGTGCCACGCGTGTCCCGGAGAGGCTCAGCCCGGAGCGAC 1200  
FVB GCAGTGGGGCGGGCTGGAGCCGGGGCGGAGCTGCGCGGGTTCGCGGTGCGGAGGAGCGGGCTCGCGGGGGCGGAGCGTGTGTGCGCTCCCTTTGACGCTCGGTGCCACGCGTGTCCCGGAGAGGCTCAGCCCGGAGCGAC 1200

C57 CCGGAGGACGAAGTGGTGGACGGACTCGGGGGTGGCTGCCAGGCAGGGTTGTGAGCGACGCCGCGGCACAGCGCGGGAGCCGGGAAGCCCTAGAGCACTGCGGCCCTCCTGACCCTCGGGACCGGGCGCGGCTAGCGTGGGGTTTCTC 1350  
FVB CCGGAGGACGAAGTGGTGGACGGACTCGGGGGTGGCTGCCAGGCAGGGTTGTGAGCGACGCCGCGGCACAGCGCGGGAGCCGGGAAGCCCTAGAGCACTGCGGCCCTCCTGACCCTCGGGACCGGGCGCGGCTAGCGTGGGGTTTCTC 1350

C57 CTCCGCGGCCAGCTCGGGCAGCCGAGTCTCCTCTGTGCGCCGCACTGCGCGTTCGCGGTTCGCCGCTCGGGCGGCTCACCTGGGCGCAGCGCGGGCAGGGCGCGCCTCGGGACGCAGGTGGAGCGGGCAGGGCGCGGGCACC 1500  
FVB CTCCGCGGCCAGCTCGGGCAGCCGAGTCTCCTCTGTGCGCCGCACTGCGCGTTCGCGGTTCGCCGCTCGGGCGGCTCACCTGGGCGCAGCGCGGGCAGGGCGCGCCTCGGGACGCAGGTGGAGCGGGCAGGGCGCGGGCACC 1500

C57 ATG 1503  
FVB ATG 1503

ACGT promoter region  
ATG start codon  
ACGT exon 1

### AhR cDNA (2564bp)

```

C57 ATGAGCAGCGGCGCCAACATCACCTATGCCAGCCGCAAGCGGGTGCAGAAAACAGTAAAGCCCATCCCCTGAAGGAATTAAGTCAAATCCTTCTAAGCGACACAGAGACCGGCTGAACACAGAGTTAGA CGCCTGGCC 150
FVB ATGAGCAGCGGCGCCAACATCACCTATGCCAGCCGCAAGCGGGTGCAGAAAACAGTAAAGCCCATCCCCTGAAGGAATTAAGTCAAATCCTTCTAAGCGACACAGAGACCGGCTGAACACAGAGTTAGA CGCCTGGCC 150

C57 AGCCTGTGTGCCCTTCCCGCAAGATGTTATTAATAAGCTGGACAAAACCTCTGTCTTAGGCTCAGCGTCAGCTACCTGAGGGCCAAAGACTTCTTTGATGTTGCATTAAAGTCCACCCCTGTGACAGAAATGGAGGCCAGGACCAGTGT 300
FVB AGCCTGTGTGCCCTTCCCGCAAGATGTTATTAATAAGCTGGACAAAACCTCTGTCTTAGGCTCAGCGTCAGCTACCTGAGGGCCAAAGACTTCTTTGATGTTGCATTAAAGTCCACCCCTGTGACAGAAATGGAGGCCAGGACCAGTGT 300

C57 AGAGCACAAAATCAGAGACTGGCAGGATTTGCAAGAAGGAGAGTCTTGTGTACAGGCGCTGAATGGCTTTGTGCTGGTTGTACAGCAGATGCCTTGGTCTTCTATGCTTCTCCACTATCCAAGATTACCTGGGCTTTCAGCAGTCTGAT 450
FVB AGAGCACAAAATCAGAGACTGGCAGGATTTGCAAGAAGGAGAGTCTTGTGTACAGGCGCTGAATGGCTTTGTGCTGGTTGTACAGCAGATGCCTTGGTCTTCTATGCTTCTCCACTATCCAAGATTACCTGGGCTTTCAGCAGTCTGAT 450

C57 GTCATCCATCAGAGCGTATATGAGCTCATCCATACAGAAGACCGGGCGAATTCAGCGCCAGCTTCACTGGGCTCTAAACCCAGACTCTGCACAAGGAGTGGACGAAGCCCATGGCCCTCCACAGGCAGCAGTCTATTATACCCAGAC 600
FVB GTCATCCATCAGAGCGTATATGAGCTCATCCATACAGAAGACCGGGCGAATTCAGCGCCAGCTTCACTGGGCTCTAAACCCAGACTCTGCACAAGGAGTGGACGAAGCCCATGGCCCTCCACAGGCAGCAGTCTATTATACCCAGAC 600

C57 CAGCTTCTCCAGAGAACGCTTCTTTCATGGAGAGTGTCTCAGGTGCCGGCTGAGGTGCCTGCTGGATAATTCATCTGGTTTCTGGCAATGAATTTCCAAGGGAGGTTAAAGTATCTTCATGGACAGAACAAGAAAGGAAGGACGGA 750
FVB CAGCTTCTCCAGAGAACGCTTCTTTCATGGAGAGTGTCTCAGGTGCCGGCTGAGGTGCCTGCTGGATAATTCATCTGGTTTCTGGCAATGAATTTCCAAGGGAGGTTAAAGTATCTTCATGGACAGAACAAGAAAGGAAGGACGGA 750

C57 GCCTGTCTTCTCCACAACCTGGCTTTGTTTGAATAGCTACTCCACTTCAGCCACCCTCCATCTGGAATTCGAACCAAAAACCTTCTTTCAGGACCAACAACAAGCTAGACTTCACACCTATTGGTTGTGATGCCAAAGGGCAGCTT 900
FVB GCCTGTCTTCTCCACAACCTGGCTTTGTTTGAATAGCTACTCCACTTCAGCCACCCTCCATCTGGAATTCGAACCAAAAACCTTCTTTCAGGACCAACAACAAGCTAGACTTCACACCTATTGGTTGTGATGCCAAAGGGCAGCTT 900

C57 ATTCTGGGCTATACAGAAGTAGAGCTGTGCACAAGAGGATCGGGGTACCAGTTCATCCA GCTGCAGACAT CTTCACTGTGCAGAAATCCACATCCGCATGATTAAGACTGGAGAAAGTGGCATGACAGTTTTCCGGCT TTTGCAAAA 1050
FVB ATTCTGGGCTATACAGAAGTAGAGCTGTGCACAAGAGGATCGGGGTACCAGTTCATCCA GCTGCAGACAT CTTCACTGTGCAGAAATCCACATCCGCATGATTAAGACTGGAGAAAGTGGCATGACAGTTTTCCGGCT TTTGCAAAA 1050

C57 CACAGTCGCTGGAGGTGGTCCAGTCCAATGCACGCTTGATTTACAGAAAATGGAAGACCAGATTACATCATCGCCACTCAGAGACCACTGACGGATGAAGAAGGACGAGAGCATTTACAGAAGCGAAGTACGTCGCTGCCTTCATGTTT 1200
FVB CACAGTCGCTGGAGGTGGTCCAGTCCAATGCACGCTTGATTTACAGAAAATGGAAGACCAGATTACATCATCGCCACTCAGAGACCACTGACGGATGAAGAAGGACGAGAGCATTTACAGAAGCGAAGTACGTCGCTGCCTTCATGTTT 1200

C57 GCTACCGGAGAGGCTGTGTTGTACGAGATCTCCAGCCCTTCTCTCCCAATAATGGATCCCTACCAATACGCACCAAAAAGCAACACTAGCAGAAAAGACTGGGCTCCCCAGTCAACCCCAAGTAAGGATTTTCCACCCAGTTCCTTT 1350
FVB GCTACCGGAGAGGCTGTGTTGTACGAGATCTCCAGCCCTTCTCTCCCAATAATGGATCCCTACCAATACGCACCAAAAAGCAACACTAGCAGAAAAGACTGGGCTCCCCAGTCAACCCCAAGTAAGGATTTTCCACCCAGTTCCTTT 1350

C57 ATGAGTGCCCTCATCCAGCAGGATGAGTCCATCTATCT GTGCTCCTTCAAGCCCTGCGC GTTAGACAGCCATTTTCTCATGGGCTCCGTGAGCAAGTGCAGGAGTTGGCAAGACAGCTTTGCGGGCCGAGGAAGTGAGGCTGCGCTG 1500
FVB ATGAGTGCCCTCATCCAGCAGGATGAGTCCATCTATCT GTGCTCCTTCAAGCCCTGCGC GTTAGACAGCCATTTTCTCATGGGCTCCGTGAGCAAGTGCAGGAGTTGGCAAGACAGCTTTGCGGGCCGAGGAAGTGAGGCTGCGCTG 1500

C57 AAACATGAGCAAAATGGCCATGCTCAGGACGTGAACCTTGCACTCTTGCGGGCCCTCAGAGCTCTTCCGGATAATAAAAAATAATGACTTGTACAGCATCATGAGGAACCTTGGGATTGATTTTGAAGATATCAGAAGCATGCAGAAC 1650
FVB AAACATGAGCAAAATGGCCATGCTCAGGACGTGAACCTTGCACTCTTGCGGGCCCTCAGAGCTCTTCCGGATAATAAAAAATAATGACTTGTACAGCATCATGAGGAACCTTGGGATTGATTTTGAAGATATCAGAAGCATGCAGAAC 1650

C57 GAGGAGTCTTTCAGAACTGACTCCACCGCTGTGGTGTGAGTTGACTTCAAAGACATCGACATAACGGACGAAATCTGACCTACGTGCAGGATTCCTGAACAATTAACCTTTGCTGAACTCGGCTTGCCAGCAGCAGCCTGTGACTCAG 1800
FVB GAGGAGTCTTTCAGAACTGACTCCACCGCTGTGGTGTGAGTTGACTTCAAAGACATCGACATAACGGACGAAATCTGACCTACGTGCAGGATTCCTGAACAATTAACCTTTGCTGAACTCGGCTTGCCAGCAGCAGCCTGTGACTCAG 1800

C57 CACCTAAGCTGTATGCTGCAGGAGCGCTGCAACTAGAGCAACAGCAACAGCTTCAGCAGCCCCCGCGCAGGCTCTGGAGCCCCAGCAGCAGCTGTGTGATGGTGTGCCCCAGCAAGATCTGGTCCGAGCACACGCAAAATCAAC 1950
FVB CACCTAAGCTGTATGCTGCAGGAGCGCTGCAACTAGAGCAACAGCAACAGCTTCAGCAGCCCCCGCGCAGGCTCTGGAGCCCCAGCAGCAGCTGTGTGATGGTGTGCCCCAGCAAGATCTGGTCCGAGCACACGCAAAATCAAC 1950

C57 GGCACGTTTGCAAGTTGGAACCCACCCCTCCCGTGTCTTCAACTGTCCCAGCAGGAACTAAAGCACTATCAGCTCTTTCCAGCTTACAGGGGACTGCTCAGGAATTTCCCTACAAACCAGAGGTGGACAGTGTGCCTTACACACAG 2100
FVB GGCACGTTTGCAAGTTGGAACCCACCCCTCCCGTGTCTTCAACTGTCCCAGCAGGAACTAAAGCACTATCAGCTCTTTCCAGCTTACAGGGGACTGCTCAGGAATTTCCCTACAAACCAGAGGTGGACAGTGTGCCTTACACACAG 2100

C57 AACTTTGTCTCCCTGTAATCAGCCTCTGCTTCCAGAACATTCGAAGAGTGTGAGTTGGACTTCCCTGGAAGGGATTTTGAACCTCCCTGCATCCC CTACTTCTAATTTAGATTTTGTGAGTTTGTCAAGTTCTGAAAACCAAAGT 2250
FVB AACTTTGTCTCCCTGTAATCAGCCTCTGCTTCCAGAACATTCGAAGAGTGTGAGTTGGACTTCCCTGGAAGGGATTTTGAACCTCCCTGCATCCC CTACTTCTAATTTAGATTTTGTGAGTTTGTCAAGTTCTGAAAACCAAAGT 2250

C57 AGTCTCAGGCATACTATGCTGGGGCCATGTCATGTATCAGTGCCAGCCAGGGCCACAGCGCACCCCTGTGGACCAGACGAGTACAGCTCTGAAATTCAGGTTTCTCAGGCATTCTAAGCAAGGTGCAGAGT G A ----- 2400
FVB AGTCTCAGGCATACTATGCTGGGGCCATGTCATGTATCAGTGCCAGCCAGGGCCACAGCGCACCCCTGTGGACCAGACGAGTACAGCTCTGAAATTCAGGTTTCTCAGGCATTCTAAGCAAGGTGCAGAGT G A ----- 2400

C57 -----
FVB GAAACCTATTCTGCTCCGACTTGAGCAGCATTGGCCACGCTGCTCAGACCACTGGCCATCTCCATCACCTGGCGGAAGCCCGCCCTTCCCGATATCACACCCGGTGGATTCCCTGTAGCTCCCATGCCAGGAT G A 2564
    
```

ATG start codon  
TGA/TGA stop codon  
ACGT coding sequence
