# Supplementary material
Source: PubMed Central journal article supplement (PMC2789234)
Supplement: NIHMS126289-supplement-stable.pdf [file NIHMS126289-supplement-stable.pdf]

Online Supplement Table I, Holdt et al.

| External Gene ID | Chr | Gene Start (bp) | Gene End (bp) | Description                                                                                                  | Ensembl Gene ID    |
|------------------|-----|-----------------|---------------|--------------------------------------------------------------------------------------------------------------|--------------------|
| 1700012B15Rik    | 12  | 3235511         | 3238282       | RIKEN cDNA 1700012B15 gene [Source:MGI;Acc:MGI:1921423]                                                      | ENSMUSG00000069618 |
| Rab10            | 12  | 3247430         | 3309969       | RAB10, member RAS oncogene family [Source:MGI;Acc:MGI:105066]                                                | ENSMUSG00000020671 |
| Kif3c            | 12  | 3365132         | 3406494       | kinesin family member 3C [Source:MGI;Acc:MGI:107979]                                                         | ENSMUSG00000020668 |
| 1110002L01Rik    | 12  | 3405308         | 3426644       | RIKEN cDNA 1110002L01 gene [Source:MGI;Acc:MGI:1915821]                                                      | ENSMUSG00000071456 |
| Asx2             | 12  | 3426857         | 3506852       | additional sex combs like 2 (Drosophila) [Source:MGI;Acc:MGI:1922552]                                        | ENSMUSG00000037486 |
| Dtnb             | 12  | 3572433         | 3781505       | dystrobrevin, beta [Source:MGI;Acc:MGI:1203728]                                                              | ENSMUSG00000071454 |
| Dnmt3a           | 12  | 3806980         | 3914443       | DNA methyltransferase 3A [Source:MGI;Acc:MGI:1261827]                                                        | ENSMUSG00000020661 |
| ENSMUSG0000007   | 12  | 3859293         | 3862244       | predicted gene, ENSMUSG00000073242 [Source:MGI;Acc:MGI:3641689]                                              | ENSMUSG00000073242 |
| Pomc             | 12  | 3954951         | 3960642       | pro-opiomelanocortin-alpha [Source:MGI;Acc:MGI:97742]                                                        | ENSMUSG00000020660 |
| C030014M07Rik    | 12  | 3962554         | 4038915       | RIKEN cDNA C030014M07 gene [Source:MGI;Acc:MGI:2444851]                                                      | ENSMUSG00000020658 |
| Rbj              | 12  | 4082612         | 4110602       | rab and DnaJ domain containing [Source:MGI;Acc:MGI:2443036]                                                  | ENSMUSG00000020657 |
| Adcy3            | 12  | 4133468         | 4213524       | adenylate cyclase 3 [Source:MGI;Acc:MGI:99675]                                                               | ENSMUSG00000020654 |
| Cenpo            | 12  | 4198459         | 4234294       | centromere protein O [Source:MGI;Acc:MGI:1923800]                                                            | ENSMUSG00000020652 |
| Ncoa1            | 12  | 4249455         | 4483976       | nuclear receptor coactivator 1 [Source:MGI;Acc:MGI:1276523]                                                  | ENSMUSG00000020647 |
| Itsn2            | 12  | 4599814         | 4720756       | intersectin 2 [Source:MGI;Acc:MGI:1338049]                                                                   | ENSMUSG00000020640 |
| 4930417G10Rik    | 12  | 4720476         | 4745225       | RIKEN cDNA 4930417G10 gene [Source:MGI;Acc:MGI:1922105]                                                      | ENSMUSG00000079177 |
| A830093I24Rik    | 12  | 4753022         | 4776038       | RIKEN cDNA A830093I24 gene [Source:MGI;Acc:MGI:2442121]                                                      | ENSMUSG00000050545 |
| Pfn4             | 12  | 4776145         | 4785537       | profilin family, member 4 [Source:MGI;Acc:MGI:1920121]                                                       | ENSMUSG00000020639 |
| 0610009D07Rik    | 12  | 4824414         | 4834464       | RIKEN cDNA 0610009D07 gene [Source:MGI;Acc:MGI:1913305]                                                      | ENSMUSG00000037361 |
| Fkbp1b           | 12  | 4839981         | 4848401       | FK506 binding protein 1b [Source:MGI;Acc:MGI:1336205]                                                        | ENSMUSG00000020635 |
| BC068281         | 12  | 4850153         | 4863731       | cDNA sequence BC068281 [Source:MGI;Acc:MGI:3040699]                                                          | ENSMUSG00000051721 |
| Gm1964           | 12  | 4869244         | 4881165       | gene model 1964, (NCBI) [Source:MGI;Acc:MGI:3583946]                                                         | ENSMUSG00000037336 |
| Ubx4             | 12  | 4885838         | 4914326       | UBX domain containing 4 [Source:MGI;Acc:MGI:2442310]                                                         | ENSMUSG00000020634 |
| Atad2b           | 12  | 4924210         | 4961800       | ATPase family, AAA domain containing 2B [Source:MGI;Acc:MGI:2444798]                                         | ENSMUSG00000052812 |
| Klh29            | 12  | 5085903         | 5382488       | kelch-like 29 (Drosophila) [Source:MGI;Acc:MGI:2683857]                                                      | ENSMUSG00000020627 |
| 2810032G03Rik    | 12  | 5419181         | 5423111       | RIKEN cDNA 2810032G03 gene [Source:MGI;Acc:MGI:1919919]                                                      | ENSMUSG00000037735 |
| Apob             | 12  | 7984479         | 8023305       | apolipoprotein B [Source:MGI;Acc:MGI:88052]                                                                  | ENSMUSG00000020609 |
| 1110057K04Rik    | 12  | 8214929         | 8292558       | RIKEN cDNA 1110057K04 gene [Source:MGI;Acc:MGI:1916082]                                                      | ENSMUSG00000037669 |
| Gdf7             | 12  | 8304740         | 8308760       | growth differentiation factor 7 [Source:MGI;Acc:MGI:95690]                                                   | ENSMUSG00000037660 |
| Hs1bp3           | 12  | 8320244         | 8349397       | HCLS1 binding protein 3 [Source:MGI;Acc:MGI:1913224]                                                         | ENSMUSG00000020605 |
| Rhob             | 12  | 8505848         | 8506438       | ras homolog gene family, member B [Source:MGI;Acc:MGI:107949]                                                | ENSMUSG00000054364 |
| Slc7a15          | 12  | 8535289         | 8605872       | solute carrier family 7 (cationic amino acid transporter, y+ system), member 15 [Source:MGI;Acc:MGI:1931751] | ENSMUSG00000020600 |
| Pum2             | 12  | 8681204         | 8758331       | pumilio 2 (Drosophila) [Source:MGI;Acc:MGI:1931751]                                                          | ENSMUSG00000020594 |
| Sdc1             | 12  | 8778202         | 8800494       | syndecan 1 [Source:MGI;Acc:MGI:1349162]                                                                      | ENSMUSG00000020592 |
| 9930038B18Rik    | 12  | 8879996         | 8884265       | RIKEN cDNA 9930038B18 gene [Source:MGI;Acc:MGI:2442156]                                                      | ENSMUSG00000042976 |
| Laptm4a          | 12  | 8928130         | 8945548       | lysosomal-associated protein transmembrane 4A [Source:MGI;Acc:MGI:108017]                                    | ENSMUSG00000020585 |
| Matn3            | 12  | 8954777         | 8978834       | matrilin 3 [Source:MGI;Acc:MGI:1328350]                                                                      | ENSMUSG00000020583 |
| Wdr35            | 12  | 8980698         | 9035652       | WD repeat domain 35 [Source:MGI;Acc:MGI:1921932]                                                             | ENSMUSG00000066643 |
| Ttc32            | 12  | 9036803         | 9043200       | tetratricopeptide repeat domain 32 [Source:MGI;Acc:MGI:1922766]                                              | ENSMUSG00000066637 |
| Osr1             | 12  | 9581303         | 9587705       | odd-skipped related 1 (Drosophila) [Source:MGI;Acc:MGI:1344424]                                              | ENSMUSG00000048387 |
| Nt5c1b           | 12  | 10376850        | 10396971      | 5'-nucleotidase, cytosolic 1B [Source:MGI;Acc:MGI:1918131]                                                   | ENSMUSG00000020622 |
| Rdh14            | 12  | 10397578        | 10402367      | retinol dehydrogenase 14 (all-trans and 9-cis) [Source:MGI;Acc:MGI:1920402]                                  | ENSMUSG00000020621 |
| Kcns3            | 12  | 11097008        | 11157179      | potassium voltage-gated channel, delayed-rectifier, subfamily S, member 3 [Source:MGI;Acc:MGI:1920402]       | ENSMUSG00000043673 |

|                |    |          |          |                                                                                                                       |                    |
|----------------|----|----------|----------|-----------------------------------------------------------------------------------------------------------------------|--------------------|
| Msgn1          | 12 | 11215188 | 11215754 | mesogenin 1 [Source:MGI;Acc:MGI:1860483]                                                                              | ENSMUSG00000047002 |
| 1700034J04Rik  | 12 | 11228622 | 11229005 | RIKEN cDNA 1700034J04 gene [Source:MGI;Acc:MGI:1920554]                                                               | ENSMUSG00000050325 |
| 5830483C08Rik  | 12 | 11246547 | 11272572 | RIKEN cDNA 5830483C08 gene [Source:MGI;Acc:MGI:2443149]                                                               | ENSMUSG00000051235 |
| Smc6           | 12 | 11272692 | 11326591 | structural maintenance of chromosomes 6 [Source:MGI;Acc:MGI:1914491]                                                  | ENSMUSG00000020608 |
| Vsnl1          | 12 | 11332053 | 11443419 | visinin-like 1 [Source:MGI;Acc:MGI:1349453]                                                                           | ENSMUSG00000054459 |
| D12Erd553e     | 12 | 12283145 | 12383165 | Protein FAM49A. [Source:Uniprot/SWISSPROT;Acc:Q8BHZ0]                                                                 | ENSMUSG00000020589 |
| Mycn           | 12 | 12942905 | 12948642 | v-myc myelocytomatosis viral related oncogene, neuroblastoma derived (avian) [Source:MGI;Acc:MGI:1914491]             | ENSMUSG00000037169 |
| Ddx1           | 12 | 13226114 | 13256019 | DEAD (Asp-Glu-Ala-Asp) box polypeptide 1 [Source:MGI;Acc:MGI:2144727]                                                 | ENSMUSG00000037149 |
| 4933425L03Rik  | 12 | 13275939 | 13324548 | RIKEN cDNA 4933425L03 gene [Source:MGI;Acc:MGI:1918419]                                                               | ENSMUSG00000073228 |
| NR_003027.1    | 12 | 13514668 | 13514774 | U6 small nuclear RNA (Rnu6) [Source:RefSeq_dna;Acc:NR_003027]                                                         | ENSMUSG00000075729 |
| AW125753       | 12 | 14154405 | 14158844 | expressed sequence AW125753 [Source:MGI;Acc:MGI:2145011]                                                              | ENSMUSG00000020607 |
| ENSMUSG0000006 | 12 | 14291243 | 14291452 | predicted gene, ENSMUSG00000066623 [Source:MGI;Acc:MGI:3642481]                                                       | ENSMUSG00000078376 |
| Trib2          | 12 | 15798535 | 15823655 | tribbles homolog 2 (Drosophila) [Source:MGI;Acc:MGI:2145021]                                                          | ENSMUSG00000020601 |
| Lpin1          | 12 | 16543442 | 16596576 | lipin 1 [Source:MGI;Acc:MGI:1891340]                                                                                  | ENSMUSG00000020593 |
| Ntsr2          | 12 | 16660276 | 16667042 | neurotensin receptor 2 [Source:MGI;Acc:MGI:108018]                                                                    | ENSMUSG00000020591 |
| Greb1          | 12 | 16678455 | 16746978 | gene regulated by estrogen in breast cancer protein [Source:MGI;Acc:MGI:2149712]                                      | ENSMUSG00000036523 |
| E2f6           | 12 | 16817775 | 16833549 | E2F transcription factor 6 [Source:MGI;Acc:MGI:1354159]                                                               | ENSMUSG00000057469 |
| Rock2          | 12 | 16901784 | 16995080 | Rho-associated coiled-coil containing protein kinase 2 [Source:MGI;Acc:MGI:107926]                                    | ENSMUSG00000020580 |
| Pqlc3          | 12 | 16995460 | 17006872 | PQ loop repeat containing [Source:MGI;Acc:MGI:2444067]                                                                | ENSMUSG00000045679 |
| Kcnf1          | 12 | 17181507 | 17182988 | potassium voltage-gated channel, subfamily F, member 1 [Source:MGI;Acc:MGI:2687399]                                   | ENSMUSG00000051726 |
| Pdia6          | 12 | 17273401 | 17291576 | protein disulfide isomerase associated 6 [Source:MGI;Acc:MGI:1919103]                                                 | ENSMUSG00000020571 |
| Atp6v1c2       | 12 | 17291529 | 17331556 | ATPase, H+ transporting, lysosomal V1 subunit C2 [Source:MGI;Acc:MGI:1916025]                                         | ENSMUSG00000020566 |
| Nol10          | 12 | 17355285 | 17437381 | nucleolar protein 10 [Source:MGI;Acc:MGI:2684913]                                                                     | ENSMUSG00000061458 |
| Odc1           | 12 | 17551679 | 17558308 | ornithine decarboxylase, structural 1 [Source:MGI;Acc:MGI:97402]                                                      | ENSMUSG00000011179 |
| Hpcal1         | 12 | 17697620 | 17798732 | hippocalcin-like 1 [Source:MGI;Acc:MGI:1855689]                                                                       | ENSMUSG00000071379 |
| EG245297       | 12 | 17999907 | 18068817 | predicted gene, EG245297 [Source:MGI;Acc:MGI:3646928]                                                                 | ENSMUSG00000071372 |
| 5730507C01Rik  | 12 | 18521544 | 18540997 | RIKEN cDNA 5730507C01 gene [Source:MGI;Acc:MGI:1917882]                                                               | ENSMUSG00000073197 |
| EG544848       | 12 | 19393665 | 19394072 | predicted gene, EG544848 [Source:MGI;Acc:MGI:3647969]                                                                 | ENSMUSG00000073187 |
| BC099486       | 12 | 20202473 | 20465075 | cDNA sequence BC099486 [Source:MGI;Acc:MGI:3695758]                                                                   | ENSMUSG00000059229 |
| 6030426L16Rik  | 12 | 20421578 | 20439560 | RIKEN cDNA 6030426L16 gene [Source:MGI;Acc:MGI:1924364]                                                               | ENSMUSG00000073184 |
| LOC668471      | 12 | 20620887 | 20621294 |                                                                                                                       | ENSMUSG00000073183 |
| 1700030C10Rik  | 12 | 20820997 | 20821332 | RIKEN cDNA 1700030C10 gene [Source:MGI;Acc:MGI:1916763]                                                               | ENSMUSG00000073182 |
| Zfp125         | 12 | 20905683 | 20906728 | zinc finger protein 125 [Source:MGI;Acc:MGI:1336211]                                                                  | ENSMUSG00000069755 |
| Ddef2          | 12 | 21117805 | 21276032 | development and differentiation enhancing factor 2 [Source:MGI;Acc:MGI:2685438]                                       | ENSMUSG00000052632 |
| Itgb1bp1       | 12 | 21275667 | 21292098 | integrin beta 1 binding protein 1 [Source:MGI;Acc:MGI:1306802]                                                        | ENSMUSG00000062352 |
| Cpsf3          | 12 | 21292247 | 21320917 | cleavage and polyadenylation specificity factor 3 [Source:MGI;Acc:MGI:1859328]                                        | ENSMUSG00000054309 |
| Iah1           | 12 | 21322250 | 21329464 | isoamyl acetate-hydrolyzing esterase 1 homolog (S. cerevisiae) [Source:MGI;Acc:MGI:191498]                            | ENSMUSG00000062054 |
| Adam17         | 12 | 21329370 | 21379454 | a disintegrin and metallopeptidase domain 17 [Source:MGI;Acc:MGI:1096335]                                             | ENSMUSG00000052593 |
| Ywhaq          | 12 | 21396190 | 21423442 | tyrosine 3-monooxygenase/tryptophan 5-monooxygenase activation protein, theta polypeptide [Source:MGI;Acc:MGI:191498] | ENSMUSG00000076432 |
| EG432637       | 12 | 22171708 | 22324391 | predicted gene, EG432637 [Source:MGI;Acc:MGI:3649058]                                                                 | ENSMUSG00000073168 |
| 2410018L13Rik  | 12 | 22990973 | 23674816 | RIKEN cDNA 2410018L13 gene [Source:MGI;Acc:MGI:1916982]                                                               | ENSMUSG00000073164 |
| ENSMUSG0000007 | 12 | 24464705 | 24465043 | predicted gene, ENSMUSG00000071362 [Source:MGI;Acc:MGI:3642221]                                                       | ENSMUSG00000071362 |
| 9030624G23Rik  | 12 | 24729160 | 24782134 | RIKEN cDNA 9030624G23 gene [Source:MGI;Acc:MGI:1914058]                                                               | ENSMUSG00000073158 |
| Taf1b          | 12 | 25183459 | 25243414 | TATA box binding protein (Tbp)-associated factor, RNA polymerase I, B [Source:MGI;Acc:MGI:1914058]                    | ENSMUSG00000059669 |
| Grh1           | 12 | 25257168 | 25302252 | grainyhead-like 1 (Drosophila) [Source:MGI;Acc:MGI:2182540]                                                           | ENSMUSG00000020656 |
| Cox7a2l        | 12 | 25323256 | 25512739 | cytochrome c oxidase subunit VIIa polypeptide 2-like [Source:MGI;Acc:MGI:106015]                                      | ENSMUSG00000066553 |

|                |    |          |          |                                                                                      |                    |
|----------------|----|----------|----------|--------------------------------------------------------------------------------------|--------------------|
| Klf11          | 12 | 25336139 | 25347540 | Kruppel-like factor 11 [Source:MGI;Acc:MGI:2653368]                                  | ENSMUSG00000020653 |
| Cys1           | 12 | 25350713 | 25366678 | cystin 1 [Source:MGI;Acc:MGI:2177632]                                                | ENSMUSG00000062563 |
| Rrm2           | 12 | 25393119 | 25398972 | ribonucleotide reductase M2 [Source:MGI;Acc:MGI:98181]                               | ENSMUSG00000020649 |
| Mboat2         | 12 | 25514254 | 25645166 | membrane bound O-acyltransferase domain containing 2 [Source:MGI;Acc:MGI:1914466]    | ENSMUSG00000020646 |
| C330002I19Rik  | 12 | 25659797 | 25746142 | RIKEN cDNA C330002I19 gene [Source:MGI;Acc:MGI:1924730]                              | ENSMUSG00000036333 |
| Id2            | 12 | 25778666 | 25780960 | inhibitor of DNA binding 2 [Source:MGI;Acc:MGI:96397]                                | ENSMUSG00000020644 |
| Rnf144a        | 12 | 26991662 | 27100121 | ring finger protein 144A [Source:MGI;Acc:MGI:1344401]                                | ENSMUSG00000020642 |
| Rsad2          | 12 | 27127608 | 27141298 | radical S-adenosyl methionine domain containing 2 [Source:MGI;Acc:MGI:1929628]       | ENSMUSG00000020641 |
| Tyki           | 12 | 27154069 | 27164700 | thymidylate kinase family LPS-inducible member [Source:MGI;Acc:MGI:99830]            | ENSMUSG00000020638 |
| EG636791       | 12 | 27825661 | 27845311 | predicted gene, EG636791 [Source:MGI;Acc:MGI:3643118]                                | ENSMUSG00000052076 |
| Sox11          | 12 | 28019129 | 28027439 | SRV-box containing gene 11 [Source:MGI;Acc:MGI:98359]                                | ENSMUSG00000063632 |
| 1110015M06Rik  | 12 | 29122660 | 29232129 | RIKEN cDNA 1110015M06 gene [Source:MGI;Acc:MGI:1915761]                              | ENSMUSG00000020633 |
| Allc           | 12 | 29238620 | 29267380 | allantoicase [Source:MGI;Acc:MGI:2136971]                                            | ENSMUSG00000020636 |
| Colec11        | 12 | 29279038 | 29308155 | collectin sub-family member 11 [Source:MGI;Acc:MGI:1918943]                          | ENSMUSG00000036655 |
| Rps7           | 12 | 29315963 | 29320790 | ribosomal protein S7 [Source:MGI;Acc:MGI:1333818]                                    | ENSMUSG00000061477 |
| Rnaseh1        | 12 | 29334505 | 29344452 | ribonuclease H1 [Source:MGI;Acc:MGI:1335073]                                         | ENSMUSG00000020630 |
| Adi1           | 12 | 29360072 | 29367040 | acireductone dioxygenase 1 [Source:MGI;Acc:MGI:2144929]                              | ENSMUSG00000020629 |
| Ttc15          | 12 | 29375495 | 29435271 | tetratricopeptide repeat domain 15 [Source:MGI;Acc:MGI:2445089]                      | ENSMUSG00000020628 |
| Tssc1          | 12 | 29436693 | 29552355 | tumor suppressing subtransferable candidate 1 [Source:MGI;Acc:MGI:1289332]           | ENSMUSG00000036613 |
| Myt1l          | 12 | 30219801 | 30605707 | myelin transcription factor 1-like [Source:MGI;Acc:MGI:1100511]                      | ENSMUSG00000061911 |
| Pxdn           | 12 | 30622999 | 30702516 | peroxidasin homolog (Drosophila) [Source:MGI;Acc:MGI:1916925]                        | ENSMUSG00000020674 |
| Tpo            | 12 | 30739527 | 30817474 | thyroid peroxidase [Source:MGI;Acc:MGI:98813]                                        | ENSMUSG00000020673 |
| Sntg2          | 12 | 30859422 | 31058199 | synthrophin, gamma 2 [Source:MGI;Acc:MGI:1919541]                                    | ENSMUSG00000020672 |
| Tmem18         | 12 | 31269309 | 31276080 | transmembrane protein 18 [Source:MGI;Acc:MGI:2387176]                                | ENSMUSG00000043061 |
| Acp1           | 12 | 31569187 | 31578719 | acid phosphatase 1, soluble [Source:MGI;Acc:MGI:87881]                               | ENSMUSG00000054204 |
| Sh3yl1         | 12 | 31596534 | 31645014 | Sh3 domain YSC-like 1 [Source:MGI;Acc:MGI:1346118]                                   | ENSMUSG00000020669 |
| 9030611O19Rik  | 12 | 31758830 | 31764802 | RIKEN cDNA 9030611O19 gene [Source:MGI;Acc:MGI:1918813]                              | ENSMUSG00000036136 |
| 6030469F06Rik  | 12 | 31856066 | 31870766 | RIKEN cDNA 6030469F06 gene [Source:MGI;Acc:MGI:3588235]                              | ENSMUSG00000073142 |
| Lamb1-1        | 12 | 31950159 | 32014504 | laminin B1 subunit 1 [Source:MGI;Acc:MGI:96743]                                      | ENSMUSG00000020900 |
| Dld            | 12 | 32016142 | 32036280 | dihydrolipoamide dehydrogenase [Source:MGI;Acc:MGI:107450]                           | ENSMUSG00000020664 |
| Slc26a3        | 12 | 32123166 | 32158584 | solute carrier family 26, member 3 [Source:MGI;Acc:MGI:107181]                       | ENSMUSG00000001225 |
| Cbl1           | 12 | 32170158 | 32184481 | Casitas B-lineage lymphoma-like 1 [Source:MGI;Acc:MGI:2144842]                       | ENSMUSG00000020659 |
| ENSMUSG0000007 | 12 | 32184933 | 32185612 | predicted gene, ENSMUSG00000073133 [Source:MGI;Acc:MGI:3642088]                      | ENSMUSG00000073133 |
| Slc26a4        | 12 | 32204692 | 32244834 | solute carrier family 26, member 4 [Source:MGI;Acc:MGI:1346029]                      | ENSMUSG00000020651 |
| Bcap29         | 12 | 32280226 | 32319464 | B-cell receptor-associated protein 29 [Source:MGI;Acc:MGI:101917]                    | ENSMUSG00000020650 |
| Dus4l          | 12 | 32324920 | 32339691 | dihydrouridine synthase 4-like (S. cerevisiae) [Source:MGI;Acc:MGI:1919166]          | ENSMUSG00000020648 |
| Cog5           | 12 | 32339734 | 32622495 | component of oligomeric golgi complex 5 [Source:MGI;Acc:MGI:2145130]                 | ENSMUSG00000035933 |
| Gpr22          | 12 | 32391739 | 32398791 | G protein-coupled receptor 22 [Source:MGI;Acc:MGI:1920260]                           | ENSMUSG00000044067 |
| Hbp1           | 12 | 32611343 | 32635088 | high mobility group box transcription factor 1 [Source:MGI;Acc:MGI:894659]           | ENSMUSG00000002996 |
| Prkar2b        | 12 | 32643341 | 32746144 | protein kinase, cAMP dependent regulatory, type II beta [Source:MGI;Acc:MGI:97760]   | ENSMUSG00000002997 |
| Pik3cg         | 12 | 32859035 | 32893514 | phosphoinositide-3-kinase, catalytic, gamma polypeptide [Source:MGI;Acc:MGI:1353576] | ENSMUSG00000020573 |
| 2010109K11Rik  | 12 | 33064287 | 33064505 | RIKEN cDNA 2010109K11 gene [Source:MGI;Acc:MGI:1919373]                              | ENSMUSG00000078373 |
| Pbef1          | 12 | 33505340 | 33536472 | pre-B-cell colony-enhancing factor 1 [Source:MGI;Acc:MGI:1929865]                    | ENSMUSG00000020572 |
| Sypl           | 12 | 33638833 | 33661769 | synaptophysin-like protein [Source:MGI;Acc:MGI:108081]                               | ENSMUSG00000020570 |
| 1110049B09Rik  | 12 | 33718661 | 33777740 | RIKEN cDNA 1110049B09 gene [Source:MGI;Acc:MGI:1916014]                              | ENSMUSG00000035860 |
| F730043M19Rik  | 12 | 33796585 | 33832462 | RIKEN cDNA F730043M19 gene [Source:MGI;Acc:MGI:2443237]                              | ENSMUSG00000052125 |

|                 |    |          |          |                                                                                                     |                    |
|-----------------|----|----------|----------|-----------------------------------------------------------------------------------------------------|--------------------|
| Atxn7l4         | 12 | 33832600 | 33936011 | ataxin 7-like 4 [Source:MGI;Acc:MGI:1919424]                                                        | ENSMUSG00000073126 |
| Drr1            | 12 | 33878864 | 33895835 | developmentally regulated repeat element-containing transcript 1 [Source:MGI;Acc:MGI:12984]         | ENSMUSG00000079143 |
| Atxn7l1         | 12 | 33987416 | 34053138 | ataxin 7-like 1 [Source:MGI;Acc:MGI:3584458]                                                        | ENSMUSG00000020564 |
| 4930504H06Rik   | 12 | 34079719 | 34086133 | RIKEN cDNA 4930504H06 gene [Source:MGI;Acc:MGI:1922290]                                             | ENSMUSG00000020562 |
| Twistnb         | 12 | 34114500 | 34125146 | TWIST neighbor [Source:MGI;Acc:MGI:106292]                                                          | ENSMUSG00000020561 |
| Ferd3l          | 12 | 34613290 | 34614175 | Fer3-like (Drosophila) [Source:MGI;Acc:MGI:2150010]                                                 | ENSMUSG00000046518 |
| Twist1          | 12 | 34642536 | 34644682 | twist gene homolog 1 (Drosophila) [Source:MGI;Acc:MGI:98872]                                        | ENSMUSG00000035799 |
| Hdac9           | 12 | 34737166 | 35213739 | histone deacetylase 9 [Source:MGI;Acc:MGI:1931221]                                                  | ENSMUSG00000004698 |
| 4921508M14Rik   | 12 | 35558773 | 35559213 | RIKEN cDNA 4921508M14 gene [Source:MGI;Acc:MGI:1918094]                                             | ENSMUSG00000052376 |
| NM_029294.2     | 12 | 35669560 | 35670524 | phosphoribosyl pyrophosphate synthetase 1-like 1 (Prps11), mRNA [Source:RefSeq_dna;Acc:MGI:1918094] | ENSMUSG00000046292 |
| Q3UFZ0_MOUSE    | 12 | 35739773 | 35741633 | B16 F10Y cells cDNA, RIKEN full-length enriched library, clone:G370056L01 product:hypothes          | ENSMUSG00000078372 |
| Snx13           | 12 | 35763409 | 35830051 | sorting nexin 13 [Source:MGI;Acc:MGI:2661416]                                                       | ENSMUSG00000020590 |
| mmu-mir-680-3   | 12 | 35879483 | 35879569 | mmu-mir-680-3 [Source:miRBase;Acc:MI0004642]                                                        | ENSMUSG00000076253 |
| Ahr             | 12 | 36182655 | 36219710 | aryl-hydrocarbon receptor [Source:MGI;Acc:MGI:105043]                                               | ENSMUSG00000019256 |
| Agr3            | 12 | 36652207 | 36676323 | anterior gradient homolog 3 (Xenopus laevis) [Source:MGI;Acc:MGI:2685734]                           | ENSMUSG00000036231 |
| Agr2            | 12 | 36719494 | 36730667 | anterior gradient 2 (Xenopus laevis) [Source:MGI;Acc:MGI:1344405]                                   | ENSMUSG00000020581 |
| Tspan13         | 12 | 36741151 | 36769117 | tetraspanin 13 [Source:MGI;Acc:MGI:1913359]                                                         | ENSMUSG00000020577 |
| EG432649        | 12 | 36816963 | 36818369 | predicted gene, EG432649 [Source:MGI;Acc:MGI:3646221]                                               | ENSMUSG00000059301 |
| Bzw2            | 12 | 36818433 | 36883407 | basic leucine zipper and W2 domains 2 [Source:MGI;Acc:MGI:1914162]                                  | ENSMUSG00000020547 |
| Ankmy2          | 12 | 36883740 | 36923878 | ankyrin repeat and MYND domain containing 2 [Source:MGI;Acc:MGI:2144755]                            | ENSMUSG00000036188 |
| 1700108M19Rik   | 12 | 36934932 | 36944789 | RIKEN cDNA 1700108M19 gene [Source:MGI;Acc:MGI:1920830]                                             | ENSMUSG00000020545 |
| Sostdc1         | 12 | 37040813 | 37045032 | sclerostin domain containing 1 [Source:MGI;Acc:MGI:1913292]                                         | ENSMUSG00000036169 |
| 4930579E17Rik   | 12 | 37108106 | 37416031 | RIKEN cDNA 4930579E17 gene [Source:MGI;Acc:MGI:1923097]                                             | ENSMUSG00000043153 |
| Meox2           | 12 | 37835133 | 37906115 | mesenchyme homeobox 2 [Source:MGI;Acc:MGI:103219]                                                   | ENSMUSG00000036144 |
| A530016O06Rik   | 12 | 37968226 | 38308519 | RIKEN cDNA A530016O06 gene [Source:MGI;Acc:MGI:2442495]                                             | ENSMUSG00000050103 |
| Dgkb            | 12 | 38607292 | 39359997 | diacylglycerol kinase, beta [Source:MGI;Acc:MGI:2442474]                                            | ENSMUSG00000036095 |
| Etv1            | 12 | 39506897 | 39594790 | ets variant gene 1 [Source:MGI;Acc:MGI:99254]                                                       | ENSMUSG00000004151 |
| Arl4a           | 12 | 40759878 | 40764574 | ADP-ribosylation factor-like 4A [Source:MGI;Acc:MGI:99437]                                          | ENSMUSG00000047446 |
| Scin            | 12 | 40786360 | 40860777 | scinderin [Source:MGI;Acc:MGI:1306794]                                                              | ENSMUSG00000002565 |
| Gm889           | 12 | 40902973 | 40925902 | gene model 889, (NCBI) [Source:MGI;Acc:MGI:2685735]                                                 | ENSMUSG00000071342 |
| Ifrd1           | 12 | 40928154 | 40949772 | interferon-related developmental regulator 1 [Source:MGI;Acc:MGI:1316717]                           | ENSMUSG00000001627 |
| EG629820        | 12 | 40949345 | 40951822 | predicted gene, EG629820 [Source:MGI;Acc:MGI:3647211]                                               | ENSMUSG00000035983 |
| Zfp277          | 12 | 41041633 | 41172361 | zinc finger protein 277 [Source:MGI;Acc:MGI:1890393]                                                | ENSMUSG00000055917 |
| Dock4           | 12 | 41172640 | 41573073 | dedicator of cytokinesis 4 [Source:MGI;Acc:MGI:1918006]                                             | ENSMUSG00000035954 |
| Immp2l          | 12 | 41794899 | 43056087 | IMP2 inner mitochondrial membrane peptidase-like (S. cerevisiae) [Source:MGI;Acc:MGI:2136]          | ENSMUSG00000056899 |
| Lrrn3           | 12 | 42178308 | 42212555 | leucine rich repeat protein 3, neuronal [Source:MGI;Acc:MGI:106036]                                 | ENSMUSG00000036295 |
| ENSMUSG00000006 | 12 | 44911530 | 44945180 | predicted gene, ENSMUSG00000066507 [Source:MGI;Acc:MGI:3642736]                                     | ENSMUSG00000066507 |
| Dnajb9          | 12 | 45306884 | 45311055 | DnaJ (Hsp40) homolog, subfamily B, member 9 [Source:MGI;Acc:MGI:1351618]                            | ENSMUSG00000014905 |
| Pnpla8          | 12 | 45370141 | 45414420 | patatin-like phospholipase domain containing 8 [Source:MGI;Acc:MGI:1914702]                         | ENSMUSG00000036257 |
| Nrcam           | 12 | 45429971 | 45699827 | neuron-glia-CAM-related cell adhesion molecule [Source:MGI;Acc:MGI:104750]                          | ENSMUSG00000020598 |
| Stxbp6          | 12 | 45953473 | 46175470 | syntaxin binding protein 6 (amisyn) [Source:MGI;Acc:MGI:2384963]                                    | ENSMUSG00000046314 |
| ENSMUSG00000005 | 12 | 46538167 | 46538892 | predicted gene, ENSMUSG00000053810 [Source:MGI;Acc:MGI:3642033]                                     | ENSMUSG00000053810 |
| Nova1           | 12 | 47797592 | 47798164 | neuro-oncological ventral antigen 1 [Source:MGI;Acc:MGI:104297]                                     | ENSMUSG00000053548 |
| Foxg1           | 12 | 50483994 | 50495114 | forkhead box G1 [Source:MGI;Acc:MGI:1347464]                                                        | ENSMUSG00000020950 |
| ENSMUSG00000004 | 12 | 50502264 | 50502824 | predicted gene, ENSMUSG00000045946 [Source:MGI;Acc:MGI:3704387]                                     | ENSMUSG00000045946 |
| Prkcm           | 12 | 51442708 | 51750090 | protein kinase C, mu [Source:MGI;Acc:MGI:99879]                                                     | ENSMUSG0000002688  |

|                |    |          |          |                                                                                |                    |
|----------------|----|----------|----------|--------------------------------------------------------------------------------|--------------------|
| ENSMUSG0000007 | 12 | 51724527 | 51727797 | predicted gene, ENSMUSG00000073105 [Source:MGI;Acc:MGI:3704388]                | ENSMUSG00000073105 |
| 6030408C04Rik  | 12 | 52449314 | 52476555 | RIKEN cDNA 6030408C04 gene [Source:MGI;Acc:MGI:2444298]                        | ENSMUSG00000035293 |
| Scfd1          | 12 | 52478567 | 52551083 | sec1 family domain containing 1 [Source:MGI;Acc:MGI:1924233]                   | ENSMUSG00000020952 |
| Coch           | 12 | 52694344 | 52706760 | coagulation factor C homolog (Limulus polyphemus) [Source:MGI;Acc:MGI:1278313] | ENSMUSG00000020953 |
| Strn3          | 12 | 52710632 | 52792874 | striatin, calmodulin binding protein 3 [Source:MGI;Acc:MGI:2151064]            | ENSMUSG00000020954 |
| Ap4s1          | 12 | 52792024 | 52839668 | adaptor-related protein complex AP-4, sigma 1 [Source:MGI;Acc:MGI:1337065]     | ENSMUSG00000020955 |
| Hectd1         | 12 | 52845511 | 52930523 | HECT domain containing 1 [Source:MGI;Acc:MGI:2384768]                          | ENSMUSG00000035247 |
| EG544864       | 12 | 52930652 | 52933441 | predicted gene, EG544864 [Source:MGI;Acc:MGI:3643232]                          | ENSMUSG00000059605 |
| Heatr5a        | 12 | 52976860 | 53072308 | HEAT repeat containing 5A [Source:MGI;Acc:MGI:2444133]                         | ENSMUSG00000035181 |
| 6530401N04Rik  | 12 | 53089794 | 53107488 | RIKEN cDNA 6530401N04 gene [Source:MGI;Acc:MGI:1923485]                        | ENSMUSG00000020956 |
| Gpr33          | 12 | 53123988 | 53129050 | G protein-coupled receptor 33 [Source:MGI;Acc:MGI:1277106]                     | ENSMUSG00000035148 |
| Nubpl          | 12 | 53198734 | 53411945 | nucleotide binding protein-like [Source:MGI;Acc:MGI:1924076]                   | ENSMUSG00000035142 |
| Arhgap5        | 12 | 53604959 | 53668839 | Rho GTPase activating protein 5 [Source:MGI;Acc:MGI:1332637]                   | ENSMUSG00000035133 |
| Akap6          | 12 | 53800370 | 54252002 | A kinase (PRKA) anchor protein 6 [Source:MGI;Acc:MGI:3050566]                  | ENSMUSG00000061603 |
| Npas3          | 12 | 54349663 | 55170061 | neuronal PAS domain protein 3 [Source:MGI;Acc:MGI:1351610]                     | ENSMUSG00000021010 |
